# Supplementary material for: The Impact of Immersive Technology on Nature Relatedness and Pro-Environmental Behavior
Source: Atypon-hosted journal article supplement (doi:10.1027/1864-1105/a000213), 2017-01-01
Supplement: 1864-1105_a000213_esm1.pdf [file 1864-1105_a000213_esm1.pdf]

## Appendix A

### Protocol of Power Analysis

F tests: ANOVA: Fixed effects, special, main effects and interactions

Analysis: A priori: Compute required sample size

Input: Effect size  $f = 0.2$

$\alpha$  Err prob = 0.05

Power ( $1 - \beta$  err prob) = 0.80

Numerator  $df = 1$

Number of groups = 4

Output: Noncentrality parameter  $\lambda = 7.9600000$

Critical  $F = 3.8895888$

Denominator  $df = 195$

Total sample size = 199

Actual power = 0.8016322

## Appendix B

### Study Materials

#### Videos

The videos are available for download through OSF: [https://osf.io/76796/?view\\_only=14b7ae2e02454663bead8a8e1e480654](https://osf.io/76796/?view_only=14b7ae2e02454663bead8a8e1e480654)

#### Inclusion of Nature in the Self (Schultz, 2002)

Please select the picture that best describes your relationship with the natural environment. How interconnected are you with nature?

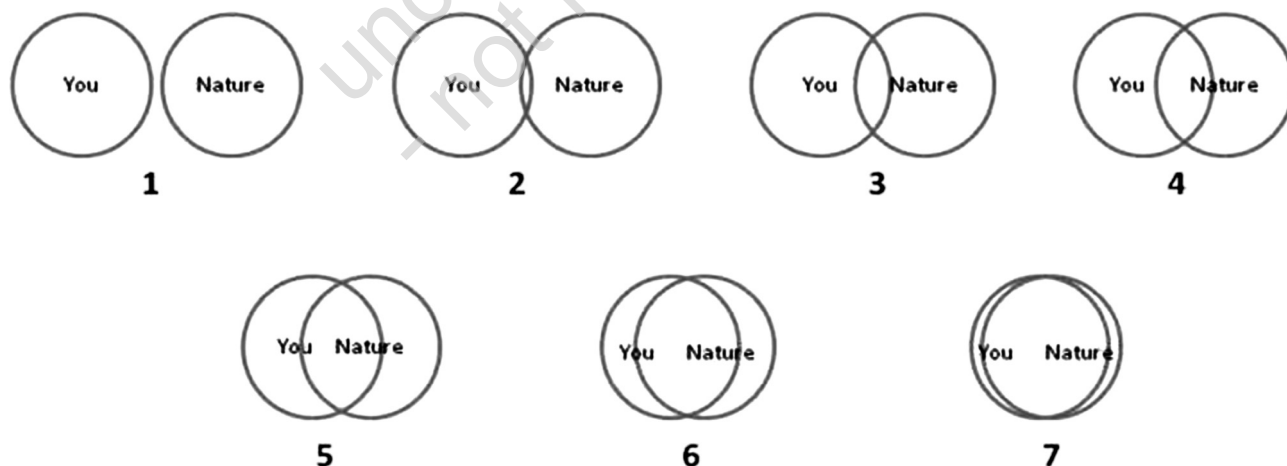

#### Connectedness to Nature (Mayer & Frantz, 2004)

Please answer each of these questions in terms of the way you currently feel. There are no right or wrong answers. Using the following scale, simply state as honestly and candidly as you can what you are presently experiencing.
