# Supplementary material for: The Impact of Immersive Technology on Nature Relatedness and Pro-Environmental Behavior
Source: Atypon-hosted journal article supplement (doi:10.1027/1864-1105/a000213), 2017-01-01
Supplement: 1864-1105_a000213_esm2.pdf [file 1864-1105_a000213_esm2.pdf]

## Appendix A

### Protocol of Power Analysis

F tests: ANOVA: Fixed effects, special, main effects and interactions

Analysis: A priori: Compute required sample size

Input: Effect size  $f = 0.2$

$\alpha$  Err prob = 0.05

Power ( $1 - \beta$  err prob) = 0.80

Numerator  $df = 1$

Number of groups = 4

Output: Noncentrality parameter  $\lambda = 7.9600000$

Critical  $F = 3.8895888$

Denominator  $df = 195$

Total sample size = 199

Actual power = 0.8016322

## Appendix B

### Study Materials

#### Videos

 The videos are available for download through OSF: [https://osf.io/76796/?view\\_only=14b7ae2e02454663bead8a8e1e480654](https://osf.io/76796/?view_only=14b7ae2e02454663bead8a8e1e480654)

#### Inclusion of Nature in the Self (Schultz, 2002)

Please select the picture that best describes your relationship with the natural environment. How interconnected are you with nature?

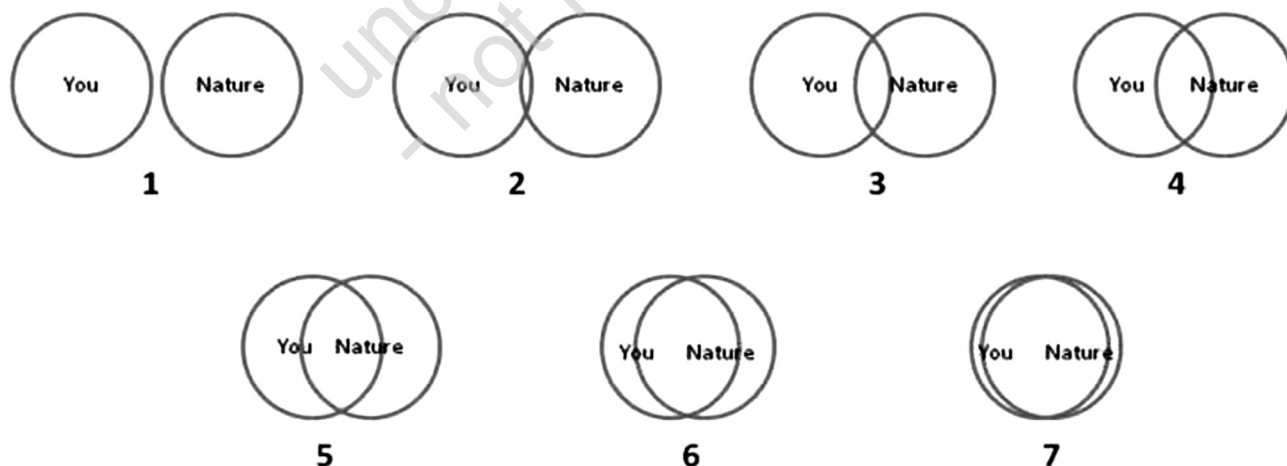

#### Connectedness to Nature (Mayer & Frantz, 2004)

Please answer each of these questions in terms of the way you currently feel. There are no right or wrong answers. Using the following scale, simply state as honestly and candidly as you can what you are presently experiencing.

| 1                 | 2 | 3 | 4 | 5              |
|-------------------|---|---|---|----------------|
| Strongly disagree |   |   |   | Strongly agree |

1. I often feel a sense of oneness with the natural world around me.
2. I think of the natural world as a community to which I belong.
3. I recognize and appreciate the intelligence of other living organisms.
4. I often feel disconnected from nature.
5. When I think of my life, I imagine myself to be part of a larger cyclical process of living.
6. I often feel a kinship with animals and plants.
7. I feel as though I belong to the Earth as equally as it belongs to me.
8. I have a deep understanding of how my actions affect the natural world.
9. I often feel part of the web of life.
10. I feel that all inhabitants of Earth, human, and nonhuman, share a common "life force."
11. Like a tree can be part of a forest, I feel embedded within the broader natural world.
12. When I think of my place on Earth, I consider myself to be a top member of a hierarchy that exists in nature.
13. I often feel like I am only a small part of the natural world around me, and that I am no more important than the grass on the ground or the birds in the trees.
14. My personal welfare is independent of the welfare of the natural world.

Read each item and then select the appropriate answer using the scale below. Indicate to what extent you feel this way right now; that is, at the present moment.

| 1                           | 2 | 3 | 4 | 5         |
|-----------------------------|---|---|---|-----------|
| Very slightly or not at all |   |   |   | Extremely |

Happy

Sad

#### Presence (Adapted From Witmer & Singer, 1998)

| 1          | 2 | 3 | 4 | 5 | 6 | 7          |
|------------|---|---|---|---|---|------------|
| Not at all |   |   |   |   |   | Completely |

How involved were you in the virtual environment experience?

How completely were all of your senses engaged?

How much did the visual aspects of the environment involve you?

How much did the auditory aspects of the environment involve you?

How inconsistent or disconnected was the information coming from your various senses?

How much did your experiences in the virtual environment seem consistent with your real-world experiences?

To what degree did you feel confused or disoriented during the experimental session?

How completely were you able to actively survey or search the environment using vision?

How well could you identify sounds?

How well could you localize sounds?

How aware were you of events occurring in the real world around you?

How aware were you of your display devices?

How well could you concentrate on the video itself rather than on the mechanisms used to display that video? (adapted)

How pleasant was the video that you watched?

|                     |   |   |   |               |
|---------------------|---|---|---|---------------|
| 1                   | 2 | 3 | 4 | 5             |
| Not at all pleasant |   |   |   | Very pleasant |

How fun was the video to watch?

|                |   |   |   |          |
|----------------|---|---|---|----------|
| 1              | 2 | 3 | 4 | 5        |
| Not at all fun |   |   |   | Very fun |

Age: \_\_\_\_\_

Gender: \_\_\_\_\_

### Pro-Environmental Behavior (Experimenter Script)

- Thank you for completing the computer questionnaire.
- You will read the debriefing form on the screen. To keep a copy of that form for your records, would you like to receive it by e-mail or to get a hard copy of it now? [record participant's choice]
- Before reading that information, we would also like to ask you about a couple of things:
- Our lab has a monthly electronic newsletter that talks about nature and sustainability. Would you like to receive our lab's sustainability newsletter? [record participant's choice]
- You can also learn more about [University name] sustainability strategic plan by downloading a PDF file. Would you like to receive the download link for this plan? [record participant's choice]
